# Supplementary material for: Discovery of 4-acetyl-3-(4-fluorophenyl)-1-(p-tolyl)-5-methylpyrrole as a dual inhibitor of human P-glycoprotein and Staphylococcus aureus Nor A efflux pump
Source: Royal Society of Chemistry journal article supplement (doi:10.1039/c5ob00246j), 2015-01-01
Supplement: c5ob00246j1.pdf [file c5ob00246j1.pdf]

## Electronic Supporting Information (ESI)

### **Discovery of 4-acetyl-3-(4-fluorophenyl)-1-(p-tolyl)-5-methylpyrrole as a dual inhibitor of human P-glycoprotein and *Staphylococcus aureus* Nor A efflux pump<sup>□</sup>**

**Jaideep B. Bharate,<sup>ab</sup> Samsheer Singh,<sup>c</sup> Abubakar Wani,<sup>bd</sup> Sadhana Sharma,<sup>bc</sup> Prashant  
Joshi,<sup>ab</sup> Inshad A. Khan,<sup>bc</sup> Ajay Kumar,<sup>d\*</sup> Ram A. Vishwakarma,<sup>ab\*</sup> Sandip B. Bharate<sup>ab\*</sup>**

<sup>a</sup>*Medicinal Chemistry Division, CSIR - Indian Institute of Integrative Medicine, Canal Road,  
Jammu-180001, India. Fax: +91-191-2586333; Tel: +91-191-2585006 (Extn. 345); \*E-  
mail: ram@iiim.ac.in (R.A.V.); sbharate@iiim.ac.in (S.B.B.)*

<sup>b</sup>*Academy of Scientific & Innovative Research (AcSIR), CSIR - Indian Institute of Integrative  
Medicine, Canal Road, Jammu-180001, India*

<sup>c</sup>*Clinical Microbiology Division, CSIR - Indian Institute of Integrative Medicine, Canal Road,  
Jammu-180001, India.*

<sup>d</sup>*Cancer Pharmacology Division, CSIR - Indian Institute of Integrative Medicine, Canal Road,  
Jammu-180001, India. Fax: +91-191-2586333; Tel: +91-191-2585006 (Extn. 352). \*E-mail:  
ajaykmahajan@hotmail.com (A.K.)*

□ *IIIM Publication number IIIM/1774/2015*

## CONTENTS

| Content                                                                                                               | Page no. |
|-----------------------------------------------------------------------------------------------------------------------|----------|
| <b>S1.</b> General procedure for synthesis of pyrroles <b>5a-q</b>                                                    | S2       |
| <b>S2.</b> Spectral data of representative compounds                                                                  | S3       |
| <b>S3.</b> <sup>1</sup> H, <sup>13</sup> C, DEPT135, HSQC, and HMBC spectra scans of compound <b>5q</b>               | S4       |
| <b>S4.</b> <sup>1</sup> H, <sup>13</sup> C, DEPT135, <sup>19</sup> F and HMBC NMR spectra scans of compound <b>5i</b> | S7       |
| <b>S5.</b> HMBC correlations and structure assignments for compound <b>5q</b>                                         | S10      |
| <b>S6.</b> Pharmacokinetic parameters of compound <b>5i</b>                                                           | S12      |

## S1. General procedure for synthesis of pyrroles 5a-q.

To the stirred solution of aniline (**2a**, 0.132 g, 1.42 mmol), benzaldehyde (**3a**, 0.1 g, 0.94 mmol), and acetylacetone (**4a**, 0.094 g, 0.94 mmol) in nitromethane (**5a**, 1.1 ml, 20 mmol) was added 10 mol% montmorillonite clay K10 or clay KSF catalyst. The mixture was refluxed for 5-8 h and then cooled to room temperature. The excess solvent was removed under vacuum, and the residue was purified by silica gel (#100-200) column chromatography using EtOAc: n-hexane (95:5) to get pyrroles **7a-q** in 68-88% yield. Pyrroles **1a-1d** and **1m** were characterized by comparison of their spectral data with literature values.<sup>1</sup>

## S2. Spectral data of representative compounds:

**1-(4-(4-Fluorophenyl)-2-methyl-1-p-tolyl-1H-pyrrol-3-yl)ethanone (5i):** Yellow Solid; m.p. 109-110 °C; <sup>1</sup>H NMR (CDCl<sub>3</sub>, 400 MHz): δ 7.33 (t, *J* = 8.0 Hz, 2H), 7.29 (d, *J* = 8.0 Hz, 2H), 7.21 (d, *J* = 8.0 Hz, 2H), 7.06 (t, *J* = 8.0 Hz, 2H), 6.61 (s, 1H), 2.42 (s, 3H), 2.39 (s, 3H), 2.07 (s, 3H); <sup>13</sup>C NMR (CDCl<sub>3</sub>, 100 MHz): δ 197.2, 163.1 (d, <sup>1</sup>*J*<sub>CF</sub> = 230 Hz), 138.2, 136.1, 135.6, 132.1, 130.8, 130.0, 126.1, 125.1, 122.4, 120.8, 115.3 (d, <sup>2</sup>*J*<sub>CF</sub> = 53.8 Hz), 31.1, 21.1, 13.0; <sup>19</sup>F NMR (376.5 MHz, CDCl<sub>3</sub>): δ -116.0, -116.0 (m, 1F); IR (CHCl<sub>3</sub>): ν<sub>max</sub> 2918, 1650, 1553, 1418, 1384, 1275, 1220, 1041 cm<sup>-1</sup>; ESI-MS: *m/z* 308.00 [M+H]<sup>+</sup>; HR-ESIMS: *m/z* 308.1449 calcd for C<sub>20</sub>H<sub>18</sub>FNO+H<sup>+</sup> (308.1445).

**(1-(4-Methoxyphenyl)-2-methyl-4-phenyl-1H-pyrrol-3-yl)(phenyl)methanone (5q):** Brown sticky solid; <sup>1</sup>H NMR (CDCl<sub>3</sub>, 400 MHz): δ 7.74 (d, *J* = 8.0 Hz, 2H), 7.31 (d, *J* = 8.0 Hz, 3H), 7.19-7.13 (m, 4H), 7.07 (t, *J* = 8.0 Hz, 2H), 7.01 (d, *J* = 12.0 Hz, 3H), 6.80 (s, 1H), 3.85 (s, 3H), 2.27 (s, 3H); <sup>13</sup>C NMR (CDCl<sub>3</sub>, 100 MHz): δ 194.2, 159.3, 157.9, 139.6, 135.5, 135.0, 131.9, 131.8, 129.9, 128.4, 127.9, 127.7, 127.5, 126.4, 125.7, 120.5, 120.3, 114.5, 55.6, 12.5; IR (CHCl<sub>3</sub>): ν<sub>max</sub> 2905, 1720, 1616, 1601, 1574, 1320, 1251 cm<sup>-1</sup>; ESI-MS: *m/z* 368.00 [M+H]<sup>+</sup>; HR-ESIMS: *m/z* 368.1648 calcd for C<sub>25</sub>H<sub>21</sub>NO<sub>2</sub>+H<sup>+</sup> (368.1645).

### S3. $^1\text{H}$ , $^{13}\text{C}$ , DEPT135 and HMBC NMR spectra scans of compound 5q

#### $^1\text{H}$ NMR

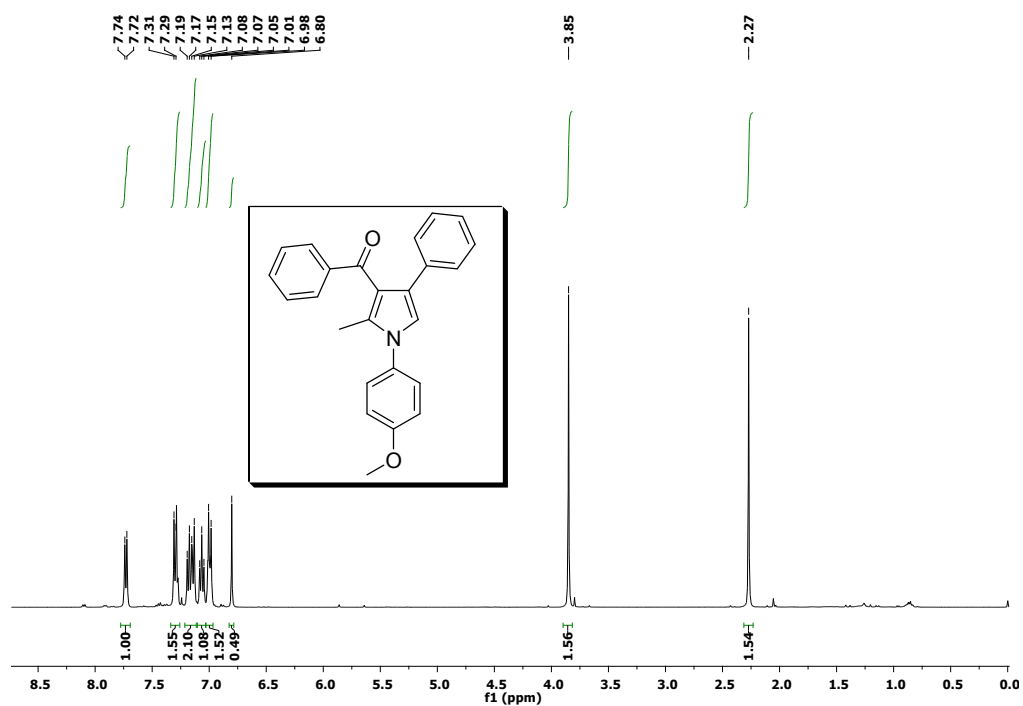

#### $^{13}\text{C}$ NMR

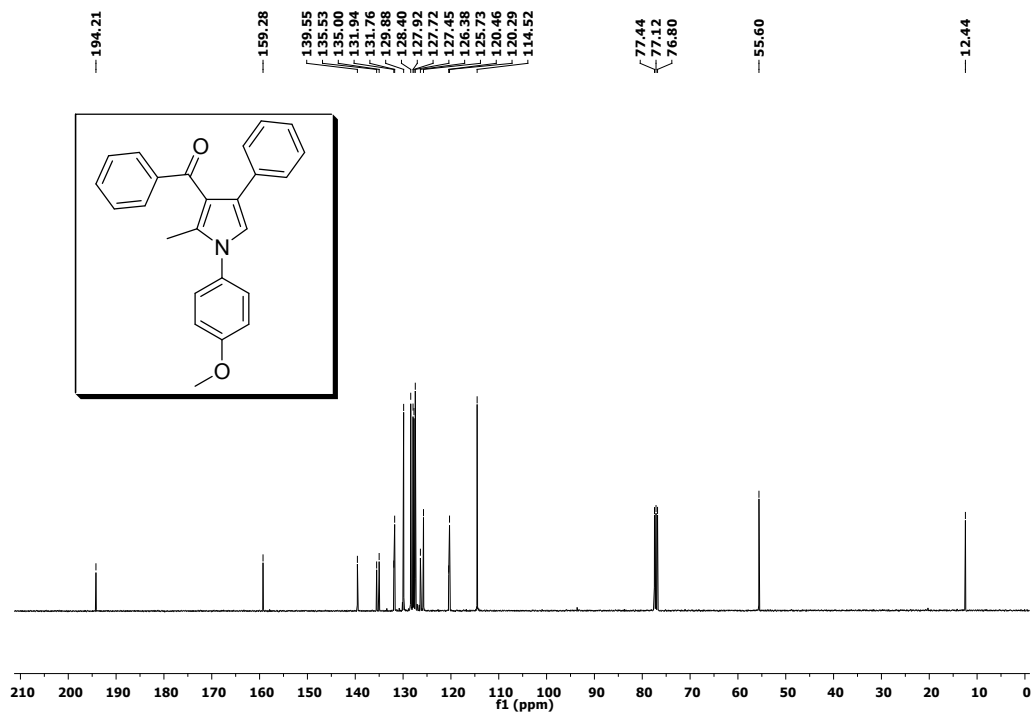

# DEPT

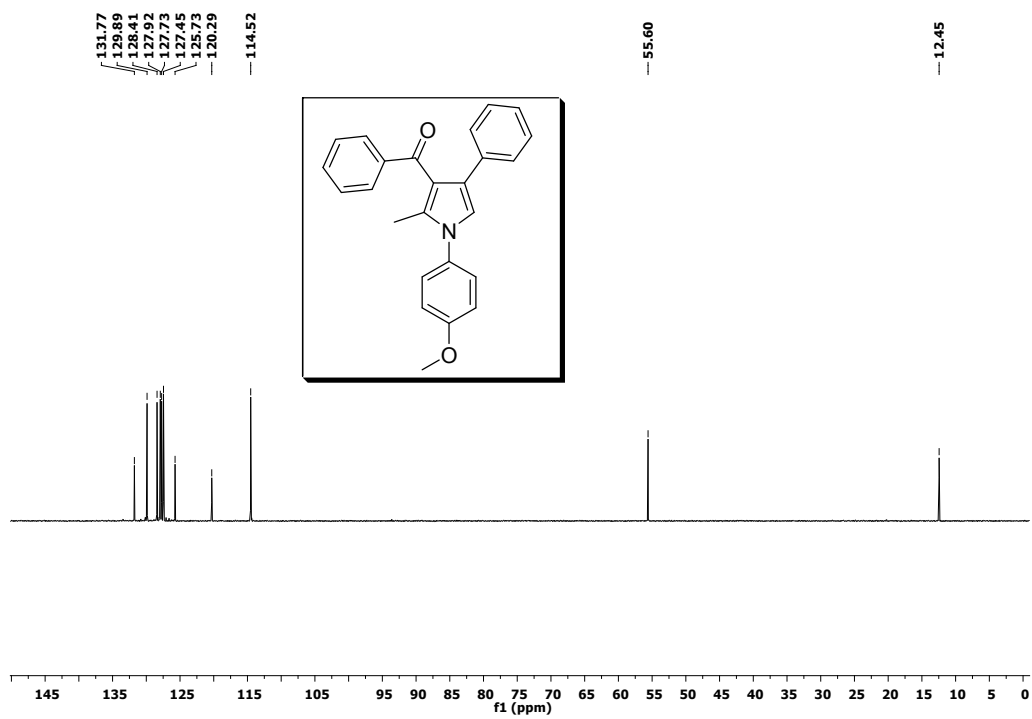

# HSQC

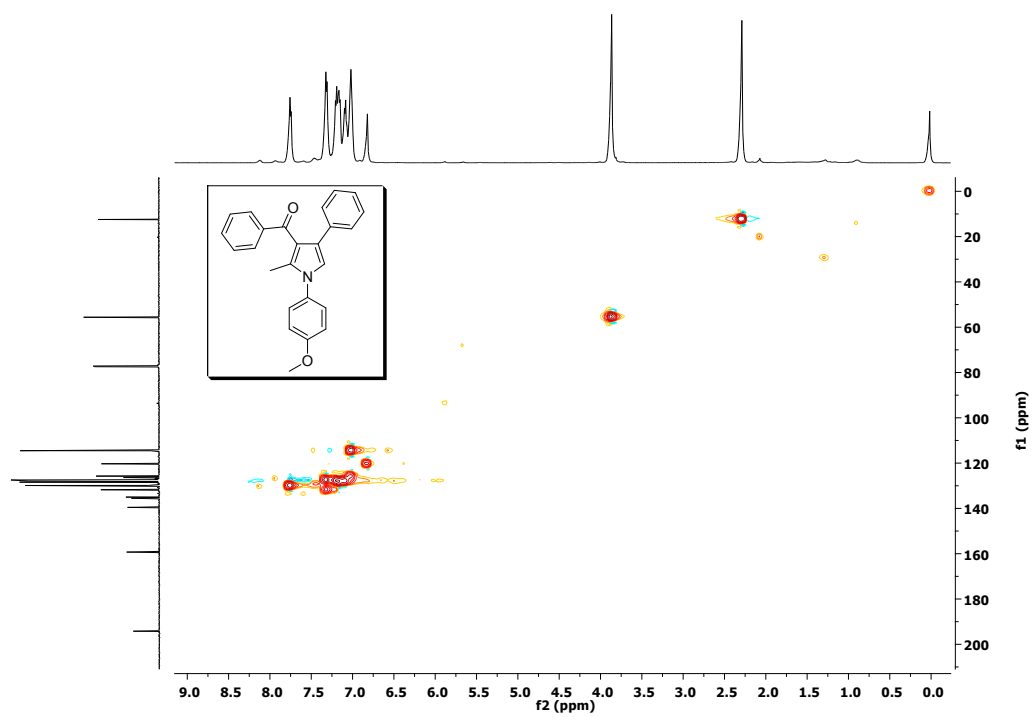

# HMBC

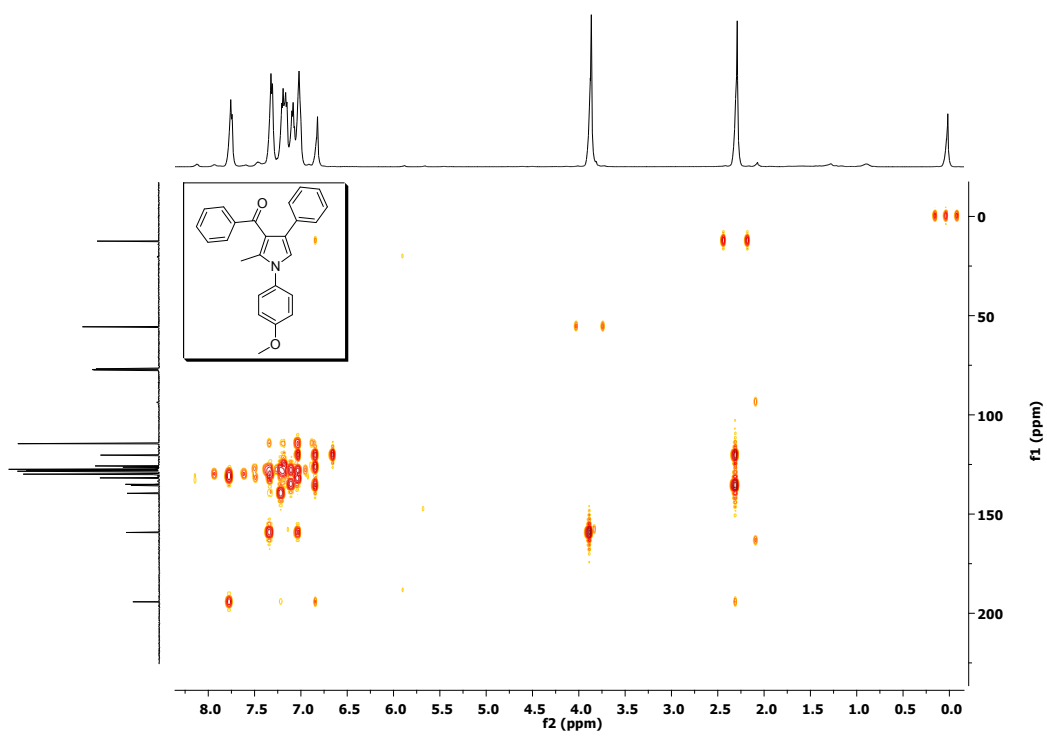

# S4. <sup>1</sup>H, <sup>13</sup>C, DEPT135 and HMBC NMR spectra scans of compound 5i

## <sup>1</sup>H NMR

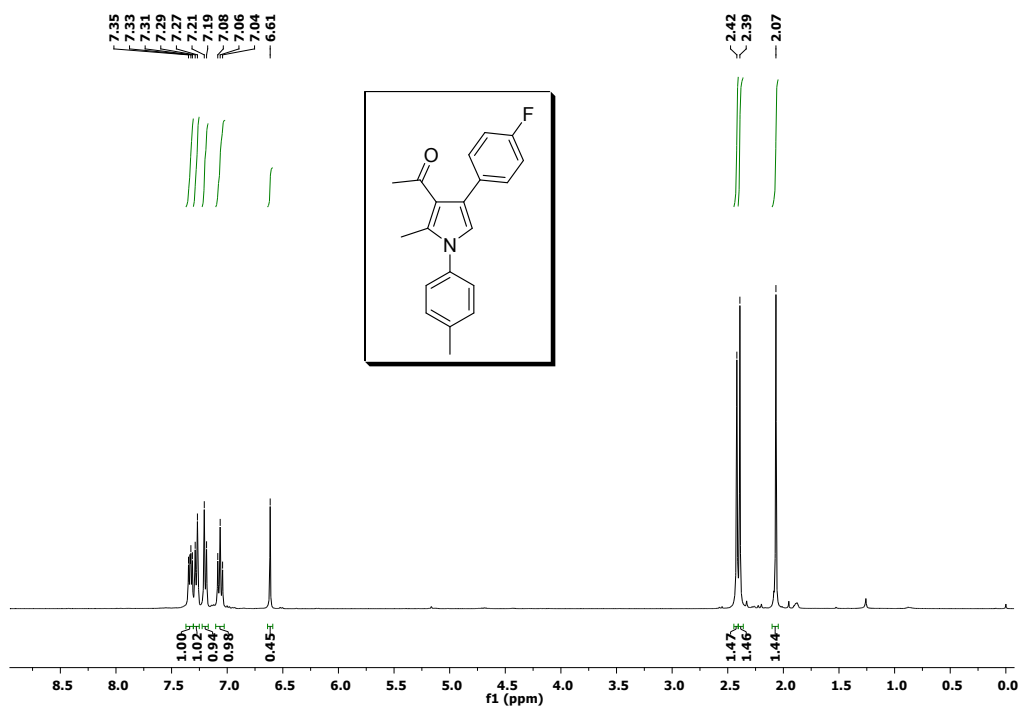

## <sup>13</sup>C NMR

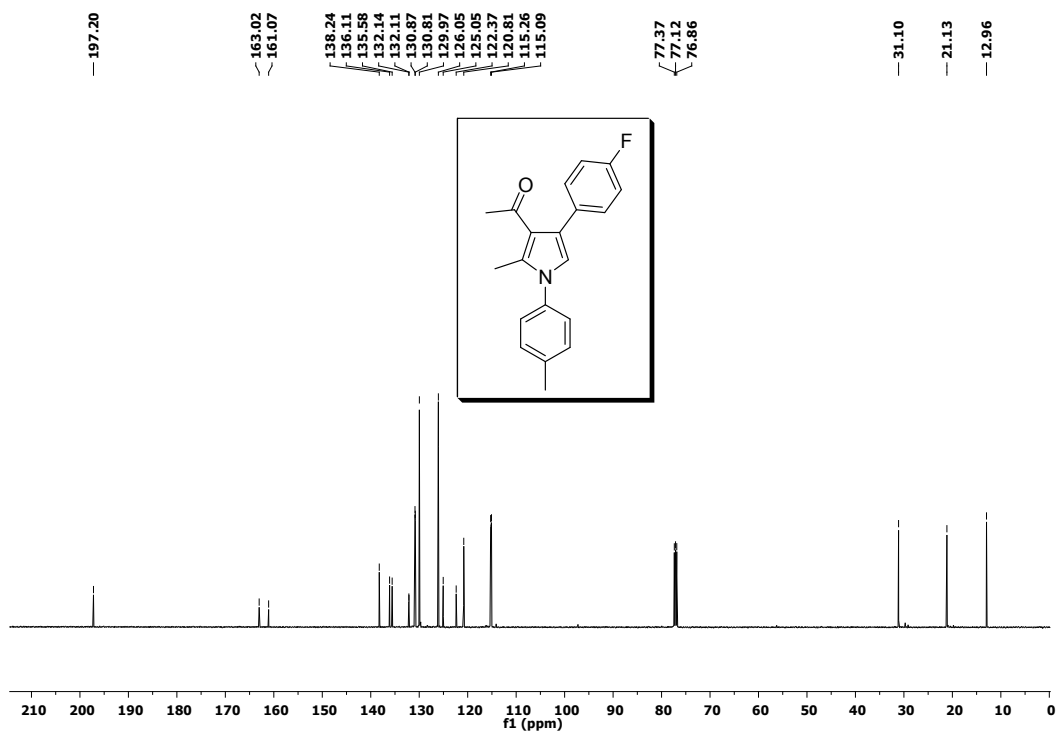

# DEPT

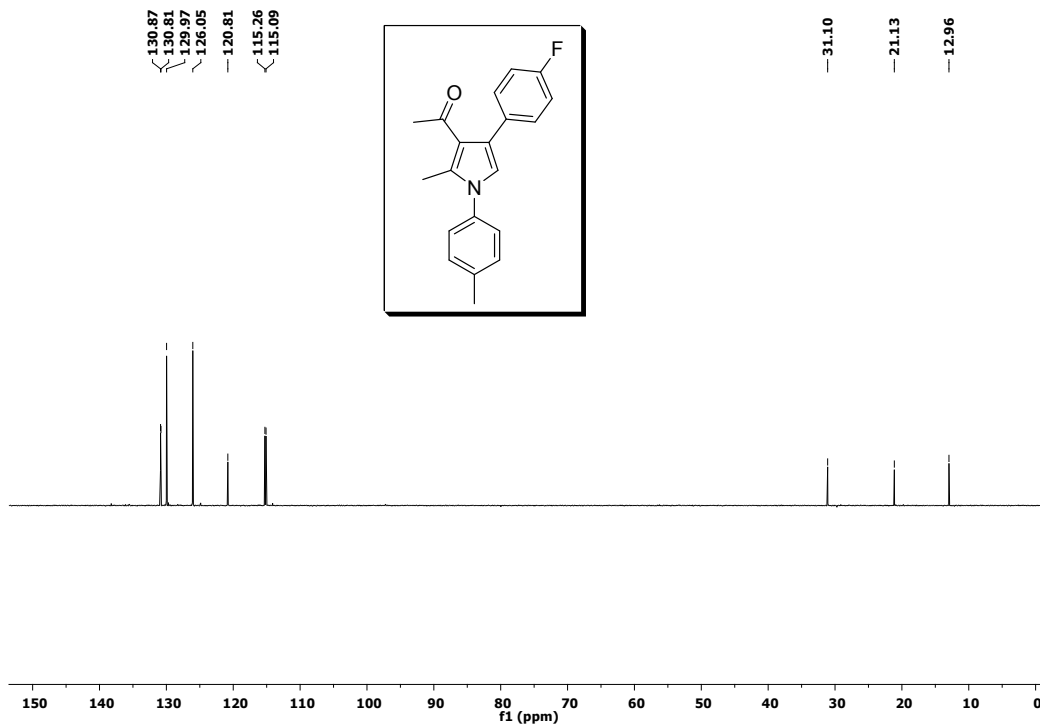

# <sup>19</sup>F NMR

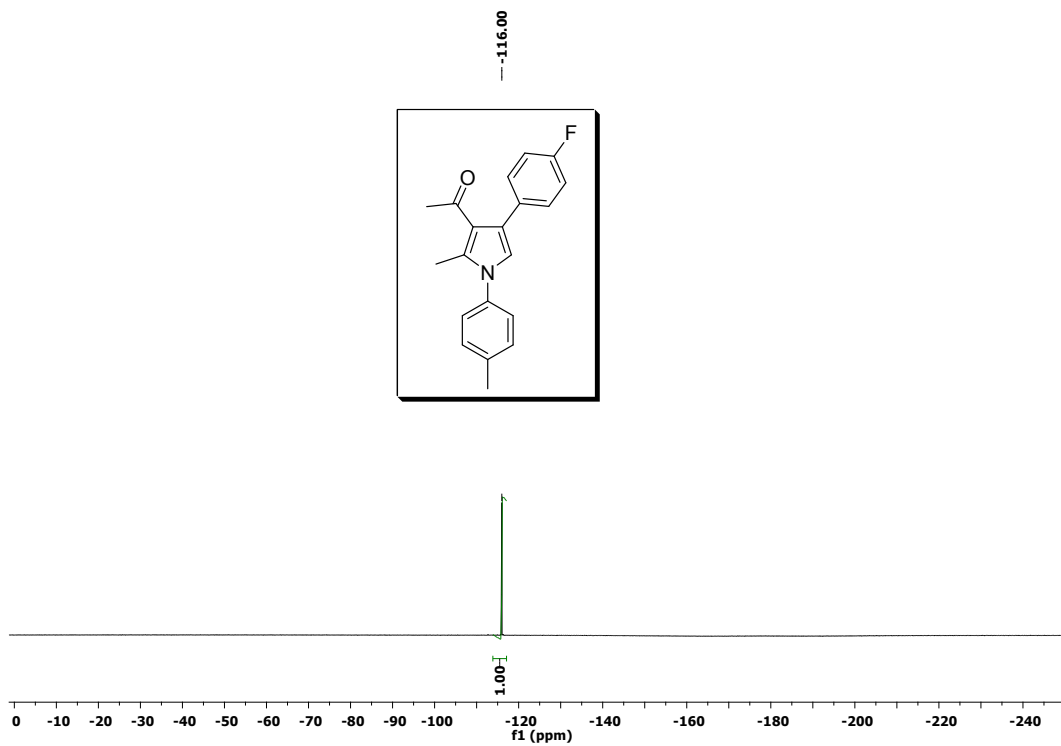



# HMBC

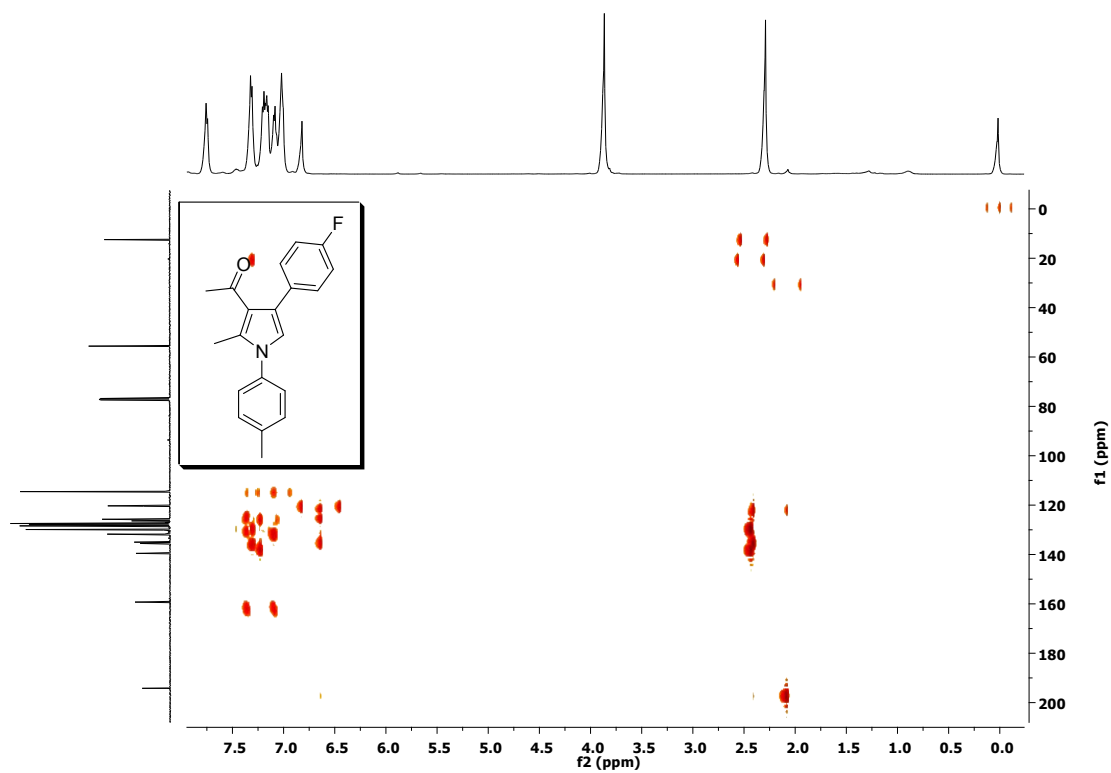

## S5. HMBC correlations and structure assignments for compound 5q

Compound numbering:

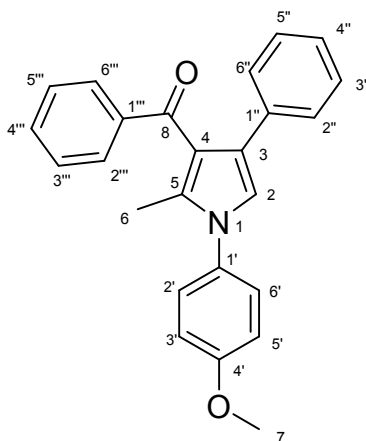

Key correlations and assignments:

|                                     |                                              |                                             |
|-------------------------------------|----------------------------------------------|---------------------------------------------|
| <p>HMBC</p>                         |                                              |                                             |
| <p><b>Key HMBC correlations</b></p> | <p><b><sup>13</sup>C NMR assignments</b></p> | <p><b><sup>1</sup>H NMR assignments</b></p> |

Assignment table:

| position | 5q                    |                | Key HMBC correlations                                                                             |
|----------|-----------------------|----------------|---------------------------------------------------------------------------------------------------|
|          | $\delta_C$            | $\delta_H$ (J) |                                                                                                   |
| 2        | 120.3, CH             | 6.80, s        | C <sub>3</sub> (139.5), C <sub>5</sub> (120.46), C <sub>8</sub> (194.2), C <sub>6'</sub> (125.73) |
| 3        | 139.5, C              |                |                                                                                                   |
| 4        | 126.4, C              |                |                                                                                                   |
| 5        | 120.5, C              |                |                                                                                                   |
| 6        | 12.4, CH <sub>3</sub> | 2.27, s        | C <sub>5</sub> (120.46), C <sub>1'</sub> (135.53)                                                 |

|            |                       |               |                                                                                                                                            |
|------------|-----------------------|---------------|--------------------------------------------------------------------------------------------------------------------------------------------|
| 7          | 55.6, CH <sub>3</sub> | 3.85 s        |                                                                                                                                            |
| 8          | 194.2, CO             |               |                                                                                                                                            |
| 1'         | 135.5, C              |               |                                                                                                                                            |
| 2', 6'     | 125.7, CH             | 7.10-7.08, m  | C <sub>1</sub> ' (135.53)                                                                                                                  |
| 3', 5'     | 114.5, CH             | 7.02, d (12)  | C <sub>4</sub> ' (159.3), C <sub>3</sub> ' (114.52)                                                                                        |
| 4'         | 159.3, C              |               |                                                                                                                                            |
| 1''        | 135.0, C              |               |                                                                                                                                            |
| 2'', 6''   | 127.7, CH             | 7.19-7.13, m  | C <sub>3</sub> (139.5), C <sub>4</sub> '' (128.41)                                                                                         |
| 3'', 5''   | 127.9, CH             | 7.19-7.13, m  |                                                                                                                                            |
| 4''        | 128.4, CH             | 7.08, t, (12) | C <sub>3</sub> '' (127.92), C <sub>2</sub> '' (127.72)                                                                                     |
| 1'''       | 131.9, C              |               |                                                                                                                                            |
| 2''', 6''' | 129.9, CH             | 7.74, d, (8)  | C <sub>6</sub> ''' (129.89), C <sub>1</sub> ''' (131.94), C <sub>8</sub> (194.2), C <sub>5</sub> ''' (131.76), C <sub>4</sub> ''' (127.45) |
| 3''', 5''' | 131.8, CH             | 7.31, d, (8)  |                                                                                                                                            |
| 4'''       | 127.5, CH             | 7.31, d, (8)  |                                                                                                                                            |

**S6. Pharmacokinetic parameters of compound 5i.** The pharmacokinetic study of compound **5i** was carried out in BALB/c male mice of age 4-6 weeks, by administering compound orally and IV formulation at dose of 10 and 1 mg/kg, respectively. Plasma samples were collected at appropriate time points between the range of 0 hours to 24 hours (0.25, 0.5, 1, 2, 4, 8, 10 and 24 h time intervals) and analyzed by LC-MS-MS. Mean plasma concentration was calculated and data was further analyzed for PK parameters evaluation using WinNonlin 5.3 software package.

The pharmacokinetic parameters are listed in Table S1.

**Table S1.** Pharmacokinetic parameters of compound **5i** in BALB/c mice

| Parameter                                               | Unit        | IV (1 mg/kg) | PO (10 mg/kg) |
|---------------------------------------------------------|-------------|--------------|---------------|
| $t_{1/2, \beta}$                                        | (h)         | 1.31         | 0.82          |
| $C_{\max}$                                              | (ng/mL)     | 158          | 15.9          |
| $C_0$                                                   | (ng/mL)     | 216          | nd            |
| $AUC_{0-t}$                                             | (ng·h/mL)   | 75.4         | 14.1          |
| $AUC_{0-\infty}$                                        | (ng·h/mL)   | 79.5         | 17.8          |
| CL                                                      | (mL/min/kg) | 210          | nd            |
| $V_d$                                                   | (L/kg)      | 23.8         | nd            |
| $V_{dss}$                                               | (L/kg)      | 11.4         | nd            |
| $T_{\text{last}}$                                       | (h)         | 4.00         | nd            |
| Time points considered for $t_{1/2, \beta}$ calculation |             | 1-4 h        | 0.5-2 h       |
| Bioavailability                                         | F (%)       | -            | 2.25          |

## References

1. S. Maiti, S. Biswas and U. Jana, *J. Org. Chem.*, 2010, **75**, 1674-1683.
